# Supplementary material for: Heat stress induces phage tolerance in Enterobacteriaceae
Source: eLife. 2025 Jul 7;14:RP105703. doi: 10.7554/eLife.105703 (PMC12234005; doi:10.7554/eLife.105703)
Supplement: Figure 1—figure supplement 2—source data 1. [file elife-105703-fig1-figsupp2-data1.xlsx]

## Sheet: Figure 1-figure supplement 1a
Figure 1-figure supplement 1a
Apperance Time
KLY	metG*
481	501
481	501
481	501
481	501
481	501
501	521
501	521
501	521
501	521
501	521
501	521
501	521
501	521
501	521
501	521
501	521
501	521
501	521
501	521
501	521
501	521
501	521
501	521
501	521
501	521
501	521
501	521
501	521
501	521
501	521
501	541
501	541
501	541
501	541
501	541
501	541
501	541
501	541
501	541
501	541
501	541
501	541
501	541
501	541
501	541
521	541
521	541
521	541
521	541
521	541
521	541
521	541
521	541
521	541
521	541
521	541
521	541
521	541
521	541
521	541
521	541
521	541
521	541
521	541
521	541
521	561
521	561
521	561
521	561
521	561
521	561
521	561
521	561
521	561
521	581
521	581
521	581
521	581
521	581
521	581
521	581
521	581
521	601
521	601
521	601
521	601
521	601
521	601
521	621
521	621
521	621
521	621
521	621
521	621
521	621
521	621
521	621
521	621
521	621
521	641
521	641
521	641
521	641
521	641
521	641
521	641
521	641
521	661
521	661
521	661
521	661
521	661
521	681
521	681
521	681
521	681
521	681
521	701
521	701
521	701
521	701
521	701
521	701
521	701
521	701
521	701
521	721
521	721
521	721
521	721
521	741
521	741
521	741
521	761
521	761
521	761
521	761
521	761
521	781
541	781
541	781
541	781
541	781
541	781
541	801
541	801
541	801
541	801
541	801
541	821
541	841
541	841
541	841
541	841
541	841
541	861
541	861
541	901
541	901
541	901
541	941
541	941
541	941
541	961
541	961
541	961
541	961
541	981
541	981
541	1021
541	1021
561	1021
561	1041
561	1041
561	1041
561	1121
561	1281
581	1341
601	1461
601	1521
481	501
481	501
501	501
501	501
501	501
501	501
501	501
501	501
501	501
501	501
501	501
501	501
501	521
501	521
501	521
501	521
501	521
501	521
501	521
501	521
501	521
501	521
501	521
501	521
501	521
501	521
501	521
501	521
501	521
501	521
501	521
501	521
501	521
501	521
501	521
501	521
501	521
501	521
501	521
501	521
501	521
501	521
501	521
501	521
501	521
501	521
521	521
521	521
521	521
521	521
521	521
521	521
521	521
521	521
521	521
521	541
521	541
521	541
521	541
521	541
521	541
521	541
521	541
521	541
521	541
521	541
521	541
521	541
521	541
521	541
521	541
521	541
521	541
521	541
521	541
521	541
521	541
521	541
521	541
521	541
521	541
521	541
521	541
521	541
521	541
521	561
521	561
521	561
521	561
521	561
521	561
521	561
521	561
521	561
521	561
521	561
521	561
521	561
521	561
521	561
521	561
521	581
521	581
521	581
521	581
521	581
521	581
521	581
521	601
521	601
521	601
521	601
521	601
521	621
521	621
521	621
521	621
521	621
521	621
521	641
521	641
521	641
521	641
521	641
521	641
521	661
521	661
521	661
521	661
521	681
521	681
521	681
521	681
521	681
521	681
521	701
541	701
541	701
541	701
541	701
541	701
541	701
541	701
541	701
541	701
541	701
541	701
541	721
541	721
541	721
541	721
541	721
541	721
541	721
541	741
541	741
541	741
541	741
541	761
541	761
541	761
541	761
541	761
541	761
541	761
541	761
541	761
541	781
541	781
541	781
541	801
541	801
541	821
541	821
541	821
541	821
541	821
541	841
541	841
541	861
541	861
541	861
541	861
541	861
541	881
541	881
541	901
541	901
541	981
541	1061
561	1081
561	1121
561	1121
561	1141
561	1201
561	1221
561	1261
561	1301
561
561
621

## Sheet: Figure 1-figure supplement 1b
Figure 1-figure supplement 1b
	EOP
KLY	7000000000	10000000000	12000000000
metG*	4000000000	8000000000	3000000000
