# Supplementary material for: Heat stress induces phage tolerance in Enterobacteriaceae
Source: eLife. 2025 Jul 7;14:RP105703. doi: 10.7554/eLife.105703 (PMC12234005; doi:10.7554/eLife.105703)
Supplement: Figure 1—source data 1. [file elife-105703-fig1-data1.xlsx]

## Sheet: Fig1b.
Fig. 1b.
Time [min]	Total (-Phage)					Resister (+Phage)
0	700000	820000	830000	990000	870000	0	0	0	0	0
20	4	3	9	1	3	0	0	0	0	0
40	2	2	3	2	/	1	0	0	0	0
60	5	3	2	1	5	3	1	0	1	0
90	8	30	12	7	/	3	1	4	2	0
120	46	14	35	32	6	3	1	12	1	1

## Sheet: Fig1c
Fig. 1c.
Ancestral population			Cycle 2			Cycle 3
700000	4	5.71429e-06	9000000	2	2.22222e-07	2100000	7	3.33333e-06
820000	2	2.43902e-06	4000000	2	5e-07	90000000	1	1.11111e-08
830000	8	9.63855e-06	1200000	10	8.33333e-06	60000000	5	8.33333e-08
990000	1	1.0101e-06
870000	3	3.44828e-06

## Sheet: Fig1d
Fig.1d.
	Phage T4						ETP
Time (min)	KLY			metG*			KLY			metG*
0	2000000	1340000	2040000	1360000	1550000	1240000	4000000	2000000	2000000	800000	200000	2000000
30	1	1	5	0	0	7
60	0	1	7	1	1	2	21000	10000	12000	140000	1000000	200000
120	1	0	2	1	1	1	12000	2500	4000	120000	200000	80000
240	1	1	7	1	1	1	8000	4000	6000	60000	40000	40000
