# Supplementary material for: Heat stress induces phage tolerance in Enterobacteriaceae
Source: eLife. 2025 Jul 7;14:RP105703. doi: 10.7554/eLife.105703 (PMC12234005; doi:10.7554/eLife.105703)
Supplement: Figure 2—figure supplement 1—source data 1. [file elife-105703-fig2-figsupp1-data1.xlsx]

## Sheet: Figure 2-figure supplement 1
Figure 2-figure supplement 1
EOP-Time/Temperature
NC	20000000000	2000000000	1000000000	7.66667e+09	2.6087	0.26087	0.130435
42℃-72h	600000000	6000000000			0.0782609	0.782609
43℃-72h	100000000	3000000000			0.0130435	0.391304
44℃-12h	8000000000	5000000000	5000000000		1.04348	0.652174	0.652174
44℃-24h	600000000	3000000000	200000000		0.0782609	0.391304	0.026087
46℃-12h	5000000000	9000000000	2000000000		0.652174	1.17391	0.26087
46℃-24h	40000000	250000000	2000000		0.00521739	0.0326087	0.00026087
50℃-0.5h	1000000000	900000000	5000000000		0.130435	0.117391	0.652174
50℃-1h	60000000	130000000	30000000		0.00782609	0.0169565	0.00391304
50℃-1.5h	9000000	4500000	10000000		0.00117391	0.000586957	0.00130435
