# Supplementary material for: Heat stress induces phage tolerance in Enterobacteriaceae
Source: eLife. 2025 Jul 7;14:RP105703. doi: 10.7554/eLife.105703 (PMC12234005; doi:10.7554/eLife.105703)
Supplement: Figure 2—source data 1. [file elife-105703-fig2-data1.xlsx]

## Sheet: Fig2a
Fig2a
EOP
NC	Starvation	Heat stress	Low pH	High pH	High Salinity	H2O2	Copper
2000000000	2500000000	500000	500000000	500000000	1000000000	1000000000	100000000
6000000000	6000000000	1999980	3000000000	857142840	6000000000	6000000000	375000000
3000000000	4000000000	500000	2000000000	900000000	2000000000	900000000	400000000
3.66667e+09	0.681818	0.000136364	0.136364	0.136364	0.272727	0.272727	0.0272727
	1.63636	0.000545449	0.818182	0.233766	1.63636	1.63636	0.102273
	1.09091	0.000136364	0.545455	0.245455	0.545455	0.245455	0.109091

## Sheet: Fig2b
Fig2b
Killing Assay (MOI 100)
Time[h]	NC-inf.					HS-inf.
0	7000000	8000000	2300000	7000000	3000000	2900000	2000000	8000000	3200000	9000000
1	9	11	2	97	43	350000	222000	1400000	390000	1090000
2	4	11	2	75	4	1200000	1080000	1700000	1370000	4950000
4	173	34	79	25	1	48000000	1100000	47000	2070000	5100000
6	14000	16	823	1400	1	360000	0	0	0	0
8	70000	36	1600	7000	137	3500000	4160000	3700000	410000	190000
Time[h]	NC-inf.					HS-inf.
0	1	1	1	1	1	1	1	1	1	1
1	1.28571e-06	1.375e-06	8.69565e-07	1.38571e-05	1.43333e-05	0.12069	0.111	0.175	0.121875	0.121111
2	5.71429e-07	1.375e-06	8.69565e-07	1.07143e-05	1.33333e-06	0.413793	0.54	0.2125	0.428125	0.55
4	2.47143e-05	4.25e-06	3.43478e-05	3.57143e-06	3.33333e-07	16.5517	0.55	0.005875	0.646875	0.566667
6	0.002	2e-06	0.000357826	0.0002	3.33333e-07	0.124138
8	0.01	4.5e-06	0.000695652	0.001	4.56667e-05	1.2069	2.08	0.4625	0.128125	0.0211111
Time[h]	NC-uninf.			HS-uninf.
0	1900000	2700000	6000000	2700000	5000000	4200000
2	6500000	68000000	113000000	89000000	13900000	181000000
4	98000000	3500000000	2840000000	140000000	830000000	650000000
8	3200000000	2300000000	6300000000	1600000000	4800000000	2800000000
Time[h]	NC-uninf.			HS-uninf.
0	1	1	1	1	1	1
2	3.42105	25.1852	18.8333	32.963	2.78	43.0952
4	51.5789	1296.3	473.333	51.8519	166	154.762
8	1684.21	851.852	1050	592.593	960	666.667

## Sheet: Fig2c
Fig2c
Infection Curve MOI 100
Time [h]	NC-uninf.		HS-uninf.		NC-inf.-1		NC-inf.-2		NC-inf.-3		HS-inf.-1		HS-inf.-2		HS-inf.-3
0	0.0933	0.0931	0.0919	0.0918	0.0923	0.0928	0.0927	0.0926	0.0927	0.0915	0.0927	0.092	0.0928	0.0925	0.0918	0.093
0.175106	0.094	0.0935	0.0918	0.092	0.0963	0.0925	0.0927	0.092	0.0927	0.0914	0.0927	0.0923	0.0927	0.0926	0.0918	0.0925
0.350039	0.0937	0.0936	0.0917	0.0917	0.0949	0.0924	0.0927	0.0937	0.0927	0.0913	0.0927	0.0921	0.0924	0.0925	0.0917	0.0924
0.524969	0.0935	0.0938	0.0918	0.0916	0.0958	0.0924	0.0926	0.0917	0.0926	0.0913	0.0928	0.0922	0.0927	0.0927	0.0918	0.0923
0.699905	0.0936	0.0937	0.0915	0.0916	0.0956	0.0925	0.0926	0.092	0.0926	0.0913	0.0926	0.0923	0.0927	0.0926	0.0917	0.0923
0.874849	0.0937	0.0936	0.0915	0.0915	0.0959	0.0925	0.0925	0.0918	0.0925	0.0914	0.0927	0.0922	0.0927	0.0925	0.0918	0.0922
1.04979	0.0937	0.0936	0.0916	0.0914	0.0966	0.0924	0.0924	0.0918	0.0924	0.0913	0.0926	0.0921	0.0926	0.0926	0.0919	0.0922
1.22471	0.0937	0.0937	0.0916	0.0916	0.0957	0.0923	0.0925	0.0923	0.0925	0.0913	0.0926	0.0922	0.0924	0.0925	0.0916	0.0923
1.39963	0.0936	0.0939	0.0914	0.0916	0.0958	0.0923	0.0925	0.0924	0.0925	0.0913	0.0926	0.0922	0.0925	0.0925	0.0918	0.0924
1.57455	0.0938	0.0939	0.0917	0.0917	0.0957	0.0923	0.0924	0.093	0.0924	0.0914	0.0927	0.0921	0.0924	0.0927	0.092	0.0922
1.74947	0.0941	0.0941	0.0919	0.0916	0.0959	0.0925	0.093	0.0917	0.093	0.0914	0.0926	0.0922	0.0926	0.0925	0.0919	0.0923
1.92441	0.0938	0.0942	0.092	0.0916	0.0958	0.0923	0.0931	0.0923	0.0931	0.0913	0.0927	0.0923	0.0926	0.0926	0.0919	0.0922
2.09935	0.0943	0.0946	0.0917	0.0919	0.0958	0.0924	0.0923	0.0923	0.0923	0.0913	0.0927	0.0922	0.0927	0.0926	0.0917	0.0924
2.27429	0.0948	0.0949	0.0921	0.092	0.0972	0.0922	0.0928	0.092	0.0928	0.0914	0.0927	0.0923	0.0925	0.0926	0.092	0.0923
2.44923	0.0954	0.0955	0.0924	0.0923	0.0957	0.0923	0.0924	0.0917	0.0924	0.0913	0.0926	0.0922	0.0926	0.0925	0.0919	0.0923
2.62416	0.0964	0.0968	0.0927	0.0928	0.0957	0.0924	0.0928	0.0923	0.0928	0.0913	0.0926	0.0921	0.0925	0.0925	0.0918	0.0921
2.79909	0.098	0.0984	0.0935	0.0934	0.0955	0.0931	0.0927	0.0919	0.0927	0.0913	0.0927	0.0921	0.0925	0.0926	0.0917	0.0924
2.97401	0.0999	0.1013	0.0945	0.0946	0.0958	0.093	0.0926	0.0919	0.0926	0.0915	0.0927	0.0924	0.0927	0.0925	0.0916	0.0921
3.14893	0.1036	0.1051	0.096	0.0961	0.096	0.0923	0.0925	0.0919	0.0925	0.0914	0.0926	0.0922	0.0924	0.0924	0.0916	0.0937
3.32385	0.1084	0.1109	0.098	0.0983	0.0958	0.0924	0.0925	0.0934	0.0925	0.0914	0.0926	0.0922	0.0926	0.0937	0.0917	0.0923
3.49877	0.116	0.1195	0.1014	0.1015	0.0957	0.0929	0.093	0.0919	0.093	0.0913	0.0926	0.0922	0.0927	0.0925	0.0916	0.0921
3.67371	0.1271	0.1327	0.1057	0.1065	0.0955	0.0922	0.0924	0.0919	0.0924	0.0913	0.0926	0.0922	0.0926	0.0925	0.0917	0.0934
3.84864	0.144	0.1531	0.1131	0.1144	0.0953	0.0923	0.0925	0.0918	0.0925	0.0912	0.0926	0.0922	0.0935	0.0925	0.0917	0.0923
4.02358	0.1661	0.1781	0.1238	0.1262	0.0956	0.0924	0.0925	0.092	0.0925	0.0914	0.0926	0.0923	0.0936	0.0927	0.0917	0.0921
4.19852	0.1991	0.2162	0.1401	0.1421	0.0955	0.0925	0.0924	0.0919	0.0924	0.0912	0.0926	0.0921	0.0936	0.0926	0.0917	0.0921
4.37346	0.2382	0.2603	0.1613	0.1641	0.0956	0.0923	0.0924	0.0938	0.0924	0.0912	0.0926	0.0922	0.0936	0.0926	0.0916	0.0922
4.54839	0.2932	0.3221	0.1924	0.1972	0.0955	0.0928	0.0926	0.0922	0.0926	0.0913	0.0925	0.0921	0.0935	0.093	0.0916	0.0921
4.72331	0.359	0.3935	0.2321	0.2388	0.0954	0.0923	0.0926	0.0932	0.0926	0.0914	0.0926	0.0921	0.0936	0.0926	0.0925	0.092
4.89822	0.4271	0.4643	0.2814	0.2895	0.0955	0.0922	0.0924	0.092	0.0924	0.0912	0.0926	0.0921	0.0935	0.0926	0.0925	0.0921
5.07313	0.48	0.5185	0.3479	0.3595	0.0954	0.093	0.0925	0.092	0.0925	0.0912	0.0926	0.0921	0.0935	0.0926	0.0925	0.092
5.24806	0.5199	0.5655	0.4145	0.4286	0.0956	0.0923	0.0925	0.0917	0.0925	0.0913	0.0926	0.0922	0.0936	0.0925	0.0925	0.0921
5.423	0.561	0.6007	0.4707	0.4863	0.0953	0.0923	0.0925	0.0918	0.0925	0.0914	0.0926	0.0923	0.0939	0.0929	0.0927	0.0919
5.59794	0.5964	0.6388	0.5108	0.5268	0.0952	0.0925	0.0924	0.0946	0.0924	0.0914	0.0926	0.0921	0.0936	0.0926	0.0925	0.092
5.77288	0.6326	0.6725	0.5489	0.564	0.0951	0.0923	0.0926	0.0925	0.0926	0.0914	0.0926	0.0922	0.0937	0.0927	0.0925	0.0927
5.94782	0.6674	0.7159	0.5845	0.6032	0.0952	0.0922	0.0924	0.0918	0.0924	0.0913	0.0926	0.0922	0.0936	0.0924	0.0925	0.0919
6.12275	0.6941	0.742	0.6222	0.6376	0.0954	0.0923	0.0925	0.0919	0.0925	0.0912	0.0925	0.0921	0.0935	0.0925	0.0925	0.0919
6.29769	0.7154	0.7613	0.6526	0.6728	0.0955	0.0922	0.0923	0.0919	0.0923	0.0913	0.0925	0.0921	0.0937	0.0926	0.0925	0.092
6.47261	0.7377	0.7817	0.6827	0.7045	0.0953	0.0922	0.0923	0.0919	0.0923	0.0914	0.0925	0.0922	0.0937	0.0925	0.0924	0.092
6.64753	0.759	0.8033	0.7041	0.7245	0.0954	0.0922	0.0925	0.0936	0.0925	0.0913	0.0925	0.092	0.0936	0.0926	0.0925	0.092
6.82245	0.7829	0.826	0.724	0.7437	0.0956	0.0922	0.0924	0.0919	0.0924	0.0912	0.0927	0.0916	0.0938	0.0926	0.0925	0.0922
6.99737	0.8026	0.8486	0.7449	0.7633	0.0955	0.0923	0.0925	0.0927	0.0925	0.0913	0.0925	0.0917	0.0937	0.0926	0.0925	0.092
7.17229	0.8183	0.8651	0.7669	0.7848	0.0956	0.0926	0.0925	0.0938	0.0925	0.0914	0.0925	0.0921	0.0936	0.0926	0.0925	0.0922
7.34723	0.8331	0.8814	0.7884	0.8057	0.0953	0.0922	0.093	0.0918	0.093	0.0914	0.0925	0.0918	0.0934	0.0925	0.0926	0.092
7.52216	0.8478	0.8958	0.8063	0.8252	0.0956	0.0923	0.0923	0.0917	0.0923	0.0913	0.0925	0.0921	0.0948	0.0926	0.0925	0.0934
7.6971	0.8619	0.9099	0.8229	0.8415	0.0956	0.0923	0.0925	0.0917	0.0925	0.0913	0.0925	0.0922	0.0935	0.0925	0.0926	0.0922
7.87204	0.8746	0.922	0.8368	0.8549	0.0954	0.0924	0.0925	0.0929	0.0925	0.0913	0.0924	0.0917	0.0936	0.0925	0.0927	0.0923
8.04697	0.8882	0.935	0.8504	0.8684	0.0943	0.0927	0.0927	0.0928	0.0927	0.0913	0.093	0.0932	0.0936	0.0924	0.0927	0.092
8.2219	0.8991	0.9473	0.8634	0.8814	0.0956	0.0922	0.0924	0.0928	0.0924	0.0911	0.0927	0.0927	0.0936	0.0926	0.0929	0.092
8.39682	0.9117	0.9584	0.8772	0.8935	0.0951	0.0922	0.0925	0.0928	0.0925	0.0913	0.0927	0.0935	0.0935	0.0925	0.093	0.0925
8.57174	0.924	0.9701	0.8888	0.9055	0.0962	0.0922	0.0925	0.0926	0.0925	0.0913	0.0925	0.0927	0.0935	0.0926	0.0932	0.092
8.74666	0.9337	0.983	0.9007	0.9165	0.0955	0.0923	0.0925	0.093	0.0925	0.0913	0.0926	0.0927	0.0935	0.0925	0.0934	0.092
8.92158	0.9429	0.9924	0.9132	0.9274	0.0955	0.0922	0.0924	0.0927	0.0924	0.0914	0.0927	0.0925	0.0937	0.0925	0.0937	0.092
9.09651	0.951	0.9994	0.9252	0.9387	0.0952	0.0922	0.0925	0.0928	0.0925	0.0914	0.0926	0.0927	0.0935	0.0924	0.0941	0.0919
9.27145	0.9584	1.0063	0.9356	0.9501	0.0952	0.0922	0.0923	0.0926	0.0923	0.0913	0.0927	0.0925	0.0936	0.0925	0.0945	0.092
9.44638	0.9656	1.013	0.9434	0.9582	0.0953	0.0922	0.0925	0.0926	0.0925	0.0921	0.0928	0.0927	0.0936	0.0926	0.0953	0.0921
9.62133	0.9719	1.0201	0.9514	0.9658	0.0952	0.0923	0.0926	0.0929	0.0926	0.0924	0.0927	0.0926	0.0936	0.0927	0.0961	0.0919
9.79627	0.9802	1.0269	0.9584	0.9731	0.096	0.0921	0.0924	0.0927	0.0924	0.0924	0.0926	0.0917	0.0938	0.0927	0.0972	0.0918
9.97121	0.9868	1.0335	0.9653	0.9797	0.0951	0.0925	0.0925	0.0925	0.0925	0.0923	0.0927	0.0921	0.0936	0.0926	0.0986	0.0936
10.1461	0.9937	1.0397	0.9724	0.9855	0.0955	0.0921	0.0923	0.0926	0.0923	0.0922	0.0927	0.0918	0.0949	0.1046	0.1003	0.0921
10.321	1.0002	1.047	0.9794	0.9917	0.0952	0.0922	0.0925	0.0925	0.0925	0.0922	0.0929	0.0918	0.0955	0.1095	0.1026	0.0921
10.496	1.0063	1.0523	0.986	0.9976	0.0955	0.0923	0.0924	0.0925	0.0924	0.0923	0.093	0.0918	0.0961	0.1162	0.1057	0.0922
10.6709	1.0133	1.0589	0.9926	1.0035	0.0963	0.0921	0.0925	0.0926	0.0925	0.0924	0.0932	0.092	0.0969	0.1255	0.1092	0.092
10.8458	1.0198	1.0654	0.9993	1.0099	0.0943	0.0922	0.0925	0.0925	0.0924	0.0923	0.0934	0.092	0.0977	0.1386	0.114	0.0916
11.0207	1.0264	1.0704	1.0056	1.0161	0.0953	0.0923	0.0924	0.0925	0.0924	0.0921	0.0937	0.0922	0.0993	0.1576	0.1199	0.0917
11.1957	1.033	1.0764	1.0121	1.0208	0.0962	0.0922	0.0925	0.0927	0.0925	0.0923	0.0941	0.0923	0.1017	0.1848	0.1275	0.0921
11.3706	1.0386	1.0823	1.018	1.0265	0.0953	0.0923	0.0934	0.0925	0.0925	0.0922	0.0945	0.0926	0.1051	0.1992	0.1373	0.0918
11.5456	1.0445	1.0884	1.0237	1.0319	0.095	0.0922	0.0924	0.0927	0.0924	0.0922	0.0953	0.0929	0.1097	0.2154	0.1497	0.0921
11.7205	1.0511	1.0942	1.0299	1.0376	0.0952	0.0922	0.0926	0.0927	0.0923	0.0922	0.0961	0.0932	0.1162	0.2322	0.166	0.0922
11.8954	1.0544	1.1003	1.0361	1.0435	0.0946	0.0924	0.0925	0.0926	0.0923	0.0922	0.0972	0.0936	0.1256	0.2517	0.186	0.0917
12.0703	1.0567	1.1042	1.0422	1.0489	0.0953	0.0923	0.0926	0.0926	0.0923	0.0923	0.0986	0.0944	0.1393	0.2702	0.2097	0.0921
12.2453	1.0599	1.1065	1.0475	1.0541	0.0938	0.0924	0.0927	0.0925	0.0925	0.0922	0.1003	0.0951	0.1584	0.2896	0.237	0.0921
12.4202	1.0619	1.1094	1.0532	1.0585	0.093	0.092	0.0926	0.0927	0.0923	0.0922	0.1026	0.0962	0.1826	0.3119	0.2665	0.0917
12.5951	1.063	1.1107	1.0559	1.0643	0.0958	0.0921	0.0928	0.0926	0.0924	0.0922	0.1057	0.0975	0.213	0.3336	0.3027	0.0917
12.7701	1.0656	1.1132	1.0579	1.0681	0.0931	0.092	0.0926	0.0924	0.0922	0.0922	0.1092	0.0993	0.2494	0.3551	0.3475	0.0918
12.945	1.0664	1.1141	1.0603	1.0698	0.0941	0.0922	0.0934	0.0925	0.0923	0.0922	0.114	0.1013	0.2955	0.3808	0.4012	0.0917
13.1199	1.0665	1.1166	1.0624	1.0709	0.0955	0.0922	0.0928	0.0928	0.0924	0.0922	0.1199	0.1043	0.3328	0.4016	0.4371	0.0917
13.2948	1.0664	1.1164	1.0632	1.0724	0.0961	0.0921	0.0927	0.0929	0.0931	0.0921	0.1275	0.1081	0.3851	0.4228	0.4815	0.0921
13.4698	1.0666	1.1162	1.0648	1.0747	0.0964	0.0921	0.093	0.0925	0.093	0.092	0.1373	0.1129	0.4374	0.4414	0.5304	0.0918
13.6447	1.0662	1.1163	1.0655	1.0749	0.0958	0.0922	0.0929	0.0927	0.0923	0.0922	0.1497	0.1188	0.4836	0.4604	0.5769	0.0918
13.8196	1.0666	1.1145	1.0655	1.0753	0.0952	0.0921	0.0933	0.0925	0.0924	0.0921	0.166	0.1263	0.5242	0.4767	0.6125	0.0918
13.9946	1.0659	1.1138	1.0654	1.0747	0.0938	0.0922	0.0933	0.0925	0.0929	0.0922	0.186	0.136	0.5617	0.4956	0.6503	0.092
14.1695	1.0636	1.1135	1.0653	1.0744	0.0952	0.0923	0.0936	0.0924	0.0922	0.0921	0.2097	0.1485	0.5955	0.5156	0.6924	0.092
14.3444	1.0622	1.1121	1.0647	1.0737	0.0954	0.0922	0.0938	0.0925	0.0923	0.0921	0.237	0.1641	0.631	0.5355	0.7306	0.0922
14.5194	1.063	1.11	1.0634	1.0727	0.0955	0.0921	0.0939	0.093	0.0924	0.092	0.2665	0.1843	0.6563	0.5495	0.7684	0.0923
14.6943	1.0627	1.109	1.0622	1.0719	0.094	0.0921	0.0949	0.0926	0.0925	0.0921	0.3027	0.2067	0.6769	0.5633	0.8053	0.0926
14.8692	1.0592	1.1082	1.0607	1.0701	0.0949	0.0922	0.0947	0.0925	0.0923	0.092	0.3475	0.2344	0.6953	0.5749	0.8402	0.0929
15.0441	1.0566	1.1075	1.0601	1.0686	0.0943	0.0922	0.0952	0.0926	0.0928	0.092	0.4012	0.2646	0.7154	0.5881	0.8703	0.0932
15.2191	1.0538	1.1049	1.0596	1.0672	0.0965	0.0924	0.0959	0.0926	0.0923	0.092	0.4371	0.2991	0.738	0.5998	0.8936	0.0936
15.394	1.0502	1.1026	1.0584	1.0661	0.0955	0.0921	0.0965	0.0925	0.0922	0.092	0.4815	0.343	0.7563	0.6138	0.913	0.0944
15.5689	1.0477	1.0984	1.0557	1.0646	0.094	0.0922	0.0974	0.0927	0.093	0.0922	0.5304	0.3875	0.7724	0.6268	0.9281	0.0951
15.7439	1.0447	1.095	1.0529	1.0626	0.0939	0.0921	0.0986	0.0925	0.0923	0.092	0.5769	0.4195	0.7832	0.6398	0.9406	0.0962
15.9188	1.0418	1.0918	1.0502	1.0597	0.0952	0.0922	0.0999	0.0932	0.0923	0.092	0.6125	0.4638	0.7938	0.6483	0.9474	0.0975
16.0937	1.0396	1.0898	1.0475	1.0563	0.0962	0.0922	0.101	0.1012	0.093	0.0921	0.6503	0.5069	0.8045	0.6572	0.9536	0.0993
16.2686	1.0362	1.0865	1.0444	1.053	0.0954	0.0921	0.103	0.1034	0.0929	0.092	0.6924	0.5487	0.8164	0.6655	0.9612	0.1013
16.4436	1.0345	1.0841	1.042	1.0499	0.0943	0.092	0.1051	0.1064	0.0933	0.092	0.7306	0.5794	0.826	0.674	0.9645	0.1043
16.6185	1.0325	1.0804	1.0389	1.0465	0.0953	0.092	0.1075	0.1096	0.0933	0.092	0.7684	0.6194	0.8356	0.6831	0.9673	0.1081
16.7935	1.0299	1.078	1.0364	1.0434	0.095	0.0923	0.1105	0.1141	0.0936	0.0921	0.8053	0.6616	0.8456	0.6911	0.9709	0.1129
16.9684	1.027	1.0751	1.0342	1.0403	0.095	0.0923	0.1138	0.1191	0.0938	0.0921	0.8402	0.6979	0.8546	0.7002	0.9712	0.1188
17.1433	1.0254	1.0719	1.0315	1.0381	0.0942	0.092	0.1178	0.125	0.0939	0.0919	0.8703	0.7338	0.8643	0.7095	0.9719	0.1263
17.3182	1.0231	1.0696	1.0292	1.0345	0.0949	0.0931	0.1226	0.1319	0.0949	0.0921	0.8936	0.7702	0.8738	0.7168	0.9732	0.136
17.4932	1.0216	1.068	1.027	1.0319	0.0936	0.0923	0.1282	0.1395	0.0947	0.092	0.913	0.8031	0.8801	0.7256	0.975	0.1485
17.6681	1.0189	1.0656	1.0242	1.0295	0.094	0.0922	0.1339	0.1513	0.0952	0.0922	0.9281	0.8315	0.8877	0.7342	0.9757	0.1641
17.843	1.0177	1.0628	1.022	1.0274	0.0957	0.0921	0.1395	0.1612	0.0959	0.0921	0.9406	0.8542	0.8933	0.7429	0.9765	0.1843
18.018	1.0158	1.0611	1.0202	1.0248	0.0935	0.0921	0.1455	0.1735	0.0965	0.0922	0.9474	0.8733	0.8998	0.7504	0.9784	0.2067
18.1929	1.014	1.0594	1.0182	1.0224	0.0966	0.0924	0.1522	0.1844	0.0974	0.092	0.9536	0.889	0.906	0.7584	0.9796	0.2344
18.3678	1.0124	1.0565	1.016	1.02	0.0957	0.0923	0.1585	0.1978	0.0986	0.0919	0.9612	0.9001	0.9117	0.7661	0.9817	0.2646
18.5427	1.0105	1.0547	1.0138	1.0172	0.0962	0.0921	0.1667	0.213	0.0999	0.0919	0.9645	0.9102	0.9188	0.7729	0.9802	0.2991
18.7177	1.0083	1.0527	1.0128	1.0153	0.0949	0.0923	0.1747	0.2287	0.101	0.0919	0.9673	0.9193	0.9253	0.7791	0.98	0.343
18.8926	1.0062	1.0508	1.0105	1.0128	0.0931	0.0924	0.1828	0.2495	0.103	0.0919	0.9709	0.9269	0.9319	0.787	0.9809	0.3875
19.0675	1.0053	1.049	1.0082	1.0108	0.0929	0.0922	0.1921	0.2889	0.1051	0.0919	0.9712	0.9334	0.9385	0.793	0.9886	0.4195
19.2425	1.0037	1.047	1.007	1.0078	0.0959	0.0921	0.1998	0.2907	0.1075	0.0919	0.9752	0.9373	0.9437	0.7989	0.9957	0.4638
19.4174	1.0024	1.0453	1.0053	1.0065	0.0943	0.0925	0.2107	0.2996	0.1105	0.092	0.9767	0.9397	0.9492	0.8058	1.0042	0.5069
19.5923	1.0004	1.0438	1.0028	1.0044	0.0941	0.0922	0.221	0.3105	0.1138	0.0919	0.9798	0.9421	0.9551	0.8126	1.0111	0.5487
19.7672	0.9992	1.0415	1.0007	1.0028	0.0945	0.0922	0.2322	0.3137	0.1178	0.092	0.9841	0.946	0.9592	0.8186	1.0189	0.5794
19.9421	0.9977	1.0399	0.9997	1.0005	0.0945	0.0922	0.2421	0.3541	0.1226	0.0919	0.9837	0.9479	0.9644	0.8245	1.0272	0.6194
20.1171	0.9958	1.0381	0.998	0.9982	0.094	0.0922	0.2518	0.3567	0.1282	0.0918	0.9854	0.9511	0.9702	0.8316	1.0338	0.6616
20.292	0.9947	1.0364	0.9966	0.9963	0.0943	0.0922	0.2619	0.3653	0.1339	0.0919	0.9839	0.9525	0.9748	0.838	1.0413	0.6979
20.4669	0.9929	1.0352	0.9948	0.9941	0.0953	0.0922	0.2718	0.3708	0.1395	0.0918	0.9847	0.9565	0.9773	0.8425	1.0495	0.7338
20.6419	0.9914	1.0346	0.9935	0.9921	0.0936	0.0922	0.2802	0.3708	0.1455	0.0918	0.9861	0.9587	0.9805	0.848	1.0558	0.7702
20.8168	0.9902	1.0321	0.9916	0.9902	0.0947	0.0922	0.29	0.3765	0.1522	0.0919	0.9847	0.9627	0.9819	0.8535	1.0622	0.8031
20.9917	0.9891	1.0308	0.9898	0.9885	0.0941	0.0921	0.2982	0.3798	0.1585	0.0918	0.9844	0.9655	0.9831	0.8581	1.0705	0.8315
21.1667	0.9875	1.0281	0.9879	0.9864	0.0946	0.0926	0.3064	0.3924	0.1667	0.0919	0.9857	0.9688	0.9838	0.8629	1.0775	0.8542
21.3416	0.9866	1.0273	0.9872	0.9853	0.0937	0.0921	0.3155	0.4028	0.1747	0.0918	0.9865	0.9696	0.9836	0.8689	1.0831	0.8733
21.5165	0.9856	1.0261	0.9857	0.9834	0.0942	0.0921	0.3227	0.4141	0.1828	0.0919	0.9866	0.9693	0.9843	0.873	1.0861	0.889
21.6914	0.9837	1.0242	0.9844	0.9814	0.0945	0.0922	0.3316	0.4245	0.1921	0.0919	0.9859	0.9704	0.9831	0.8762	1.0893	0.9001
21.8664	0.9824	1.0226	0.9823	0.9799	0.0945	0.0921	0.3394	0.435	0.1998	0.0917	0.9867	0.9719	0.9834	0.8802	1.0922	0.9102
22.0413	0.9809	1.0213	0.9812	0.9783	0.0943	0.093	0.3474	0.4456	0.2107	0.0917	0.9866	0.9732	0.9826	0.8837	1.0943	0.9193
22.2163	0.9802	1.02	0.9796	0.9768	0.0945	0.0921	0.3551	0.4546	0.221	0.0917	0.9882	0.975	0.9827	0.8875	1.097	0.9269
22.3912	0.9793	1.0189	0.9781	0.9742	0.0945	0.0922	0.3619	0.4658	0.2322	0.0919	0.987	0.9757	0.9823	0.8917	1.0987	0.9334
22.5661	0.9777	1.0173	0.9767	0.9728	0.0945	0.0922	0.3682	0.4771	0.2421	0.0919	0.9864	0.9765	0.9821	0.8931	1.1001	0.9373
22.741	0.9764	1.0159	0.9752	0.9713	0.0939	0.0922	0.3753	0.4834	0.2518	0.0917	0.986	0.9784	0.9815	0.9001	1.1009	0.9397
22.9159	0.9754	1.0146	0.9738	0.9695	0.094	0.0922	0.3823	0.4904	0.2619	0.0917	0.9896	0.9796	0.9822	0.9102	1.1021	0.9421
23.0909	0.9743	1.0135	0.9729	0.9683	0.0947	0.0923	0.3886	0.4974	0.2718	0.0917	0.9889	0.9817	0.9816	0.9193	1.102	0.946
23.2658	0.9731	1.0125	0.971	0.9659	0.094	0.0923	0.3957	0.5028	0.2802	0.0918	0.9892	0.9802	0.981	0.9269	1.1016	0.9479
23.4408	0.9716	1.011	0.9697	0.9649	0.0942	0.0921	0.4019	0.51	0.29	0.0918	0.9876	0.98	0.9811	0.9334	1.1023	0.9511
23.6157	0.9709	1.0096	0.9683	0.9629	0.0938	0.0923	0.4082	0.5178	0.2982	0.0916	0.9885	0.9809	0.9803	0.9373	1.1012	0.9525
23.7906	0.97	1.0087	0.9675	0.9622	0.0936	0.0921	0.4154	0.5256	0.3064	0.0916	0.9869	0.9819	0.9804	0.9397	1.0997	0.9565
23.9656	0.9688	1.007	0.9658	0.9601	0.0939	0.0922	0.4206	0.5308	0.3155	0.0916	0.9883	0.9815	0.9808	0.9421	1.0986	0.9587
24.1405	0.9683	1.0067	0.9646	0.9588	0.0945	0.0922	0.4266	0.5375	0.3227	0.0918	0.9878	0.9807	0.9813	0.946	1.0629	0.9627

## Sheet: Fig2d
Fig2d
Phage resisters
0h
	NC			HS
Phage+	0	0	0	0	0	0
Phage-	2900000	3500000	3800000	3600000	7200000	5100000
2h
	NC			HS
Phage+	3	1	4	3	2	2
Phage-	2	5	4	1500000	3900000	1100000

## Sheet: Fig2e
Fig2e
Mutation Rate
	replicates	Nt	No mutation cultures	P0	Mutation rate
		(x107)
NC	1	23	14	1	1.23x10-9
	2	3.7	12	0.875
	3	11	13	0.929
	4	5.6	13	0.929
	5	1.8	14	1
HS	1	1.9	12	0.875	3.61x10-10
	2	2.3	14	1
	3	2.8	11	0.786
	4	1.8	12	0.875
	5	1.1	14	1

## Sheet: fig2f
Fig2f
Phage resistance emergence
MOI	NC			HS
1	0	0	0	13	14	14
10	0	0	0	11	11	11
100	0	0	0	4	2	6
MOI	NC			HS
1	/	/	/	0.928571	1	1
10	/	/	/	0.785714	0.785714	0.785714
100	/	/	/	0.285714	0.142857	0.428571
