# Supplementary material for: Heat stress induces phage tolerance in Enterobacteriaceae
Source: eLife. 2025 Jul 7;14:RP105703. doi: 10.7554/eLife.105703 (PMC12234005; doi:10.7554/eLife.105703)
Supplement: Figure 3—figure supplement 2—source data 1. [file elife-105703-fig3-figsupp2-data1.xlsx]

## Sheet: Figure 3-figure supplement 2a
Figure 3-figure supplement 2a
Phage resister
	wt-KP7			wt-KP11			RKP7-KP7			RKP7-KP11
-Phage	3200000	6400000	4400000	700000	820000	830000	270000	730000	300000	900000	140000	370000
+Phage	0	1	0	0	0	0	400000	150000	700000	1	5	7

## Sheet: Figure 3-figure supplement 2b
Figure 3-figure supplement 2b
Killing
	WT-NC			WT-HS			ResKP7-NC			ResKP7-HS
	3200000	6400000	4400000	700000	820000	830000	270000	730000	300000	900000	140000	370000
KP7	7	32	1	300000	500000	230000	280000	12000000	570000	640000	117000	440000
KP11	1	12	2	170000	150000	12000	3	1	8	320000	56000	270000
KP7+KP11	1	2	1	220000	190000	17000	1	3	3	42000	54000	37000
KP7	2.1875e-06	5e-06	2.27273e-07	0.428571	0.609756	0.277108	1.03704	16.4384	1.9	0.711111	0.835714	1.18919
KP11	3.125e-07	1.875e-06	4.54545e-07	0.242857	0.182927	0.0144578	1.11111e-05	1.36986e-06	2.66667e-05	0.355556	0.4	0.72973
KP7+KP11	3.125e-07	3.125e-07	2.27273e-07	0.314286	0.231707	0.0204819	3.7037e-06	4.10959e-06	1e-05	0.0466667	0.385714	0.1
