# Supplementary material for: Heat stress induces phage tolerance in Enterobacteriaceae
Source: eLife. 2025 Jul 7;14:RP105703. doi: 10.7554/eLife.105703 (PMC12234005; doi:10.7554/eLife.105703)
Supplement: Figure 3—source data 1. [file elife-105703-fig3-data1.xlsx]

## Sheet: Fig3a b
	Fig3a/b
	EOP
			ATCC43826					KLY
	KP7	NC	9000000000	7000000000	7000000000	T1	NC	2000000000	8000000000	1200000000
		HS	50000000	20000000	10000000		HS	90000000	20000000	10000000
	KP9	NC	400000000	300000000	700000000	T4	NC	1000000000	300000000	700000000
		HS	1000000	600000	800000		HS	1000000	600000	800000
	KP10	NC	3000000000	1000000000	4000000000			KP7
		HS	100000000	60000000	50000000	K381	NC	19000000000	22000000000	12000000000
	KP11	NC	3000000000	4000000000	8000000000		HS	210000000	200000000	220000000
		HS	8000000	9000000	10000000	K359	NC	27000000000	30000000000	70000000000
							HS	3000000	700000	160000

## Sheet: Fig3c
Fig3c
EOP
	NC			HS
KP7	400000000	6000000000	1000000000	6000000	4000000	2000000
KP11	1000000000	200000000	800000000	2000000	1000000	200000
KP7+KP11	1000000000	2000000000	800000000	200000	1000000	80000

## Sheet: fig3d
Fig 3d
Resistance emergence
	KP7-Treated			KP11-Treated			Double-Treated
wt-NC	0	1	0	1	0	0	0	0	0
wt-HS	7	5	9	4	8	2	2	7	5
RKP7-NC	14	14	14	1	7	0	1	1	0
RKP7-HS	14	14	14	12	5	7	3	8	5
	KP7-Treated			KP11-Treated			Double-Treated
wt-NC	0	0.0714286	0	0.0714286	0	0	0	0	0
wt-HS	0.5	0.357143	0.642857	0.285714	0.571429	0.142857	0.142857	0.5	0.357143
RKP7-NC	1	1	1	0.0714286	0.5	0	0.0714286	0.0714286	0
RKP7-HS	1	1	1	0.857143	0.357143	0.5	0.214286	0.571429	0.357143
