# Supplementary material for: Heat stress induces phage tolerance in Enterobacteriaceae
Source: eLife. 2025 Jul 7;14:RP105703. doi: 10.7554/eLife.105703 (PMC12234005; doi:10.7554/eLife.105703)
Supplement: Figure 4—figure supplement 1—source data 1. [file elife-105703-fig4-figsupp1-data1.xlsx]

## Sheet: Figure 4-figure supplement 1
	NC	HS
	22.8359	22.6873
	23.1001	22.5717
	22.4231	22.5552
	22.8689	23.1001
	22.902	22.4892
	22.4561	22.5882
	22.902
