# Supplementary material for: Heat stress induces phage tolerance in Enterobacteriaceae
Source: eLife. 2025 Jul 7;14:RP105703. doi: 10.7554/eLife.105703 (PMC12234005; doi:10.7554/eLife.105703)
Supplement: Figure 4—source data 1. [file elife-105703-fig4-data1.xlsx]

## Sheet: Fig.4a
	Fig.4a
	Adsroption assay
		MOI=0.1			MOI=1			MOI=10
	Phage number at time 0	500000	200000	120000	7000000	1200000	9000000	70000000	100000000	60000000
	Phage number diluted 1000 times	500	200	120	7000	1200	9000	70000	100000	60000
NC	Free Phage	5	4	1	181	86	450	1050	1000	1200
		0.01	0.02	0.01	0.026	0.072	0.05	0.015	0.01	0.02
	Adsorption rate	0.99	0.98	0.99	0.974	0.928	0.95	0.985	0.99	0.98
HS	Free Phage	2	1	1	420	36	9000	1400	2000	120
		0.004	0.008	0.01	0.06	0.03	1	0.02	0.02	0.002
	Adsorption rate	0.996	0.992	0.99	0.94	0.97	0	0.98	0.98	0.998

## Sheet: Fig.4b
								Time	NC			HS
								5		0.00618	0.0015	0.00345	0.00176	0.0013
								30	8.81338	19.1392	17.7886	0.14058	0.00521	0.01873
								60	53.9791	68.0629	49.1327	0.05839	0.01086	0.02065
								120	18.8928	47.4429	13.0612	0.12535	0.04	0.01274
								180	7.36215	5.79689	6.82031	0.04161	0.17056	0.00634

## Sheet: Fig.4d
	Enrichment Score	-Log10(P-value)
Peptidoglycan metabolic process	29.63	4.72816
Regulation of cell shape	40.83	4.72816
Peptidoglycan biosynthetic process	40.01	4.72816
External encapsulating structure organization	36.67	4.72816
Cell wall organization	30.39	4.72816
Cellular component organization or biogenesis	5.25	2.49485
Cellular component biogenesis	6.49	2.4318
Cell cycle	22.99	2.27572
Cell division	24.7	2.23657
Cellular component organization	5.9	1.73518

## Sheet: Fig.4e
		NC			HS
	Original Bacterial Load	36000000	37000000	21000000	18000000	7000000	1000000	0.5	0.189189	0.047619
	Low pH (pH 3.2)	22000000	13000000	3000000	500000	220000	20000	0.0227273	0.0169231	0.00666667
	High pH (pH 10)	29000000	30000000	45000000	400000	200000	2000000	0.0137931	0.00666667	0.0444444
	H2O2(100mM)	50			50			1
	Copper (5mM CuSO4)	14000000	17000000	4000000	200000	1000	10000	0.0142857	5.88235e-05	0.0025
	Bile salt (10mg/mL)	1000000	100000000	10000000	20000	1000000	18000000	0.02	0.01	1.8
	Polymyxin E	300	172	215	20000	320000	10000	66.6667	1860.47	46.5116
	Polymyxin B	92	78	91	10000	10000	10000	108.696	128.205	109.89

## Sheet: Fig.4f
	LPS
	NC			HS
	2.663	2.08546	1.88756	1.32052	1.48691	1.58223

## Sheet: Fig.4g
	CFU
NC-0h	30000000	38000000	32000000
NC	46000000	44000000	30000000	1.53333	1.15789	0.9375
lpxC inhibitor	2000000	42000000	32000000	0.0666667	1.10526	1
NC+Polymyxin B	670	810	920	2.23333e-05	2.13158e-05	2.875e-05
NC+Polymyxin E	770	550	560	2.56667e-05	1.44737e-05	1.75e-05
lpxC inhibitor+Polymyxin B	200000	30000	20000	0.00666667	0.000789474	0.000625
lpxC inhibitor+Polymyxin E	300000	300000	80000	0.01	0.00789474	0.0025
