# Supplementary material for: Heat stress induces phage tolerance in Enterobacteriaceae
Source: eLife. 2025 Jul 7;14:RP105703. doi: 10.7554/eLife.105703 (PMC12234005; doi:10.7554/eLife.105703)
Supplement: Figure 5—source data 1. [file elife-105703-fig5-data1.xlsx]

## Sheet: fig. 5
	Figure 5b
		Ancestor			pspA*			rpoH*
	50-90	90000000	120000000	80000000	210000000	90000000	140000000	170000000	90000000	250000000
		1710000	5004000	4000000	1.1823e+08	14760000	14000000	30600000	5787000	125000000
		0.019	0.0417	0.05	0.563	0.164	0.1	0.18	0.0643	0.5
	Figure 5d
	Time [h]	Ancestor-inf.			pspA*-inf.			rpoH*-inf.			Ancestor-uninf			pspA*-uninf			rpoH*-uninf
	0	3200000	2700000	4000000	7000000	9000000	2700000	2000000	1800000	4200000	3200000	2700000	4000000	7000000	9000000	2700000	2000000	1800000	4200000
	1	12	7	13	12000000	27000000	6000000	6	13	2	7000000	50000000	20000000	16000000	60000000	40000000	12000000	29000000	54000000
	2	32	9	13	91000000	360000000	67500000	5	2	15	144000000	51300000	148000000	462000000	441000000	72900000	16000000	28800000	63000000
	6	400	350	66	448000000	200000000	700000000	75	23	134	300000000	1200000000	2000000000	2100000000	4600000000	3200000000	1000000000	2000000000	1700000000
	Time [h]
	0	1	1	1	1	1	1	1	1	1	1	1	1	1	1	1	1	1	1
	1	3.75e-06	2.59259e-06	3.25e-06	1.71429	3	2.22222	3e-06	7.22222e-06	4.7619e-07	2.1875	18.5185	5	2.28571	6.66667	14.8148	6	16.1111	12.8571
	2	1e-05	3.33333e-06	3.25e-06	13	40	25	2.5e-06	1.11111e-06	3.57143e-06	45	19	37	66	49	27	8	16	15
	6	0.000125	0.00012963	1.65e-05	64	22.2222	259.259	3.75e-05	1.27778e-05	3.19048e-05	93.75	444.444	500	300	511.111	1185.19	500	1111.11	404.762
	Figure 5e
		Ancestor			pspA*
	-Phages	3200000	2700000	4000000	7000000	9000000	2700000
	+Phages	/	/	/	5950000	10980000	2187000
