# Supplementary material for: Heat stress induces phage tolerance in Enterobacteriaceae
Source: eLife. 2025 Jul 7;14:RP105703. doi: 10.7554/eLife.105703 (PMC12234005; doi:10.7554/eLife.105703)
Supplement: Figure 6—figure supplement 1—source data 1. [file elife-105703-fig6-figsupp1-data1.xlsx]

## Sheet: Figure 6-figure supplement 1a
KP11 -1h	Ancestor-inf.			pspA*-inf.			del-pspA-inf.
	5000000	2800000	3200000	6000000	12000000	8000000	2700000	4200000	9000000
	3	23	7	21000000	42000000	60000000	32	14	50
	Ancestor-inf.			pspA*-inf.			del-pspA-inf.
	1	1	1	1	1	1	1	1	1
	6e-07	8.21429e-06	2.1875e-06	3.5	3.5	7.5	1.18519e-05	3.33333e-06	5.55556e-06

## Sheet: Figure 6-figure supplement 1b
	Ancestor			pspA*			del-pspA
EOP	3000000000	4000000000	2700000000				12000000000	7000000000	8000000000

## Sheet: Figure 6-figure supplement 1c
	Empty Vector			pspAwt
0h	2000000	6000000	1200000	900000	1200000	7000000
2h	3000000	21000000	600000	1800000	279600	2331000
	1.5	3.5	0.5	2	0.233	0.333
	Empty Vector			pspAmut
0h	4000000	2200000	7000000	1700000	2200000	1900000
2h	9	5.5	15.54	8500	2926	3173
	2.25e-06	2.5e-06	2.22e-06	0.005	0.00133	0.00167
