# Supplementary material for: Heat stress induces phage tolerance in Enterobacteriaceae
Source: eLife. 2025 Jul 7;14:RP105703. doi: 10.7554/eLife.105703 (PMC12234005; doi:10.7554/eLife.105703)
Supplement: Figure 6—source data 1. [file elife-105703-fig6-data1.xlsx]

## Sheet: Fig6
	Figure 6a
		Ancestor		pspA*		rpoH*		∆cps
	3min	99.9	99.75	86	85	99.9	99.75	52	65
	10min	99.9	99.75	76	80	99.9	99.75	72	55
	Figure 6b
	Ancestor			pspA*			rpoH*			∆cps
	25.9396	25.4308	24.1384	17.232	19.0682	18.8168	24.9992	25.8342	24.9886	13.8814	14.0318	14.0819
	Figure 6d
		WT-NC			WT-HS			∆cps			pspA*
	0	49100	46200	50200	46000	42800	44900	48400	41200		46000	50200	50000
	2	41000	41500	45333.3	39500	31000	46000	500	500		24500	19000	17000
	5	22500	18000	20000	34500	30000	23500	500	500		6500	5500	500
	10	25500	19500	19500	17500	7000	12500	500	500		4000	1000	1000
	20	14500	13000	14000	4000	7500	5000	500	500		1500	500	500
	30	12000	12500	8000	4500	3000	4500	500	500		500	500	1000
	Figure 6e
		Ancestor			pspA*			rpoH*			∆cps
		28800000	32400000	28000000	180000000	77000000	25800000	70000000	23000000	42100000	27000000	14000000	37000000
	polymyxin B	91	223	183	144000	118461	46909	1999	102	300	3	1	3
	polyminxin E	90	228	239	540000	414615	469090	210	\	3969	3	1	3
		3.15972e-06	6.88272e-06	6.53571e-06	0.0008	0.00153845	0.00181818	2.85571e-05	4.43478e-06	7.12589e-06	1.11111e-07	7.14286e-08	8.10811e-08
		3.125e-06	7.03704e-06	8.53571e-06	0.003	0.00538461	0.0181818	3e-06	#VALUE!	9.42755e-05	1.11111e-07	7.14286e-08	8.10811e-08
